# Supplementary material
Source: PubMed Central journal article supplement (PMC3203663)
Supplement: cr20117x1.pdf [file cr20117x1.pdf]

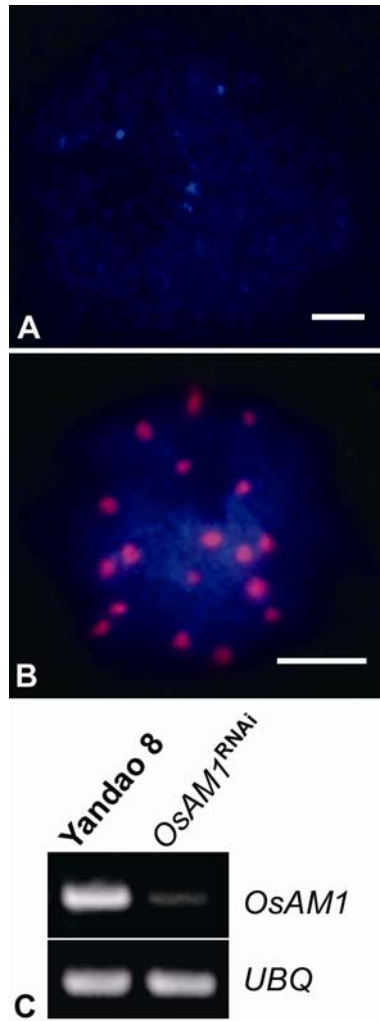

**Supplementary information, Figure S1** Chromosome behaviors and *OsAMI* expression in *OsAMI*-RNAi plants.

(A) Chromosomes are arrested at leptotene. (B) No *OsAMI* staining signals are presented (green); an anti-CENH3 antibody is used to indicate the PMC (red). Chromosomes are stained with DAPI (blue). All bars, 5 $\mu$ m. (C) RT-PCR analysis in *OsAMI*-RNAi plants.
