# Supplementary material
Source: PubMed Central journal article supplement (PMC3203663)
Supplement: cr20117x2.pdf [file cr20117x2.pdf]

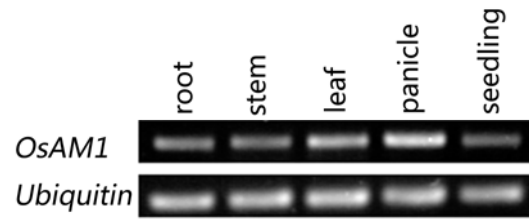

**Supplementary information, Figure S2** Expression of *OsAM1* in root, stem, leaf, panicle and seedling of wild type rice.
