# Supplementary material
Source: PubMed Central journal article supplement (PMC3203663)
Supplement: cr20117x4.pdf [file cr20117x4.pdf]

|       |                                                                                             |     |
|-------|---------------------------------------------------------------------------------------------|-----|
| OsAM1 | --NDAEMMAPALAAHLQDSPMRPOVSRYYSKRR--GSSHSRNGKDIANHDESKNQSPGLPLSRQSLSSATHYHTGAFYEIDHEKLPKKSPT | 90  |
| AM1   | MDVETVQAGPALAAHLQDASPKPOVKYYFKKTSSSHSRNGKDIYNHDSITQ--RSPLSRQSLTFDAIPYHAGAFYEIDHDLPPKSP      | 91  |
| SW1   | -----MVKRNPIRETTAGTISSPSPITN-----VAIAHIRAGSYVEIDASILQKRSPE                                  | 50  |
| OsAM1 | HLKSRIVVYVSGYTSIDVTVSPFSLILLRSEFSSERSCTG-----PFDERFVMSNHAARILRRVREBELAGDMHODSFWLTK          | 172 |
| AM1   | HLKSRIVVYVSEGNIDITVRFPSLQLLRSEFSSYAPGTC-----PFDERFVMSNHAARILRRVREBELAGDMHODSFWLTK           | 172 |
| SW1   | NLKSRIVVYVSKTASDVSLRYPSMFSRSHRDYRMRNRNPKMKRSGGGLLEVFDESHVMASELGDLIYRRIIPHELSMNRN-SWGFVWSS   | 142 |
| OsAM1 | RCYDFEASS--RHVITPSPPPAT--QAKPAPSSCLLDTLKCDGAGWVRRRVYVGRHHASAEASASLDGYNTEVSYVEEQORLRLR       | 262 |
| AM1   | RLYDFEAPQOVESITCLPFPAPPPATLGLTDECLITLTKCDGAGWGMRRRVYVGRHREAPKE--ASVDGYDTESSVREVOCP----      | 258 |
| SW1   | S-----SRNKFERRFVSCRAYNRLCRASPEGKCSSELKSGGMIKGRRLVQVQSRHIDPRNKEGEESRVKDEIYKEEEMK-----        | 225 |
| OsAM1 | LRLRQRREOENKSTNGKKREAESSMDKSAARKKAKTYKSPKVEK---RRVVEAKDGDPRGKDRWSAERYAAERLLIMRSHCA          | 352 |
| AM1   | -----PATQEVKRSERNCKKREAEASSKNNNGDEGRNKKVQGASKKSKAKKRTVESKDGDERHSGDRWSAERYAAEKLLIMRSDA       | 346 |
| SW1   | -----EEDDDGNEIGGTQEAKEITNGNRRLIESSTERAQKAVYDOKETQIVVYRKSERKFDKWSVERVKLAERNMLKVMKEKNA        | 313 |
| OsAM1 | CFCNVMRQALREARKHIGDTGLLDHLLKHMAGRVECSAARFRRRHNADGAMEYWLEPAELAEVRRLAGVSDPYWPPPGWKKGDDNSATA   | 445 |
| AM1   | RFCNVMRQVLRREARKHIGDTGLLDHLLKHMAGRVECSVHRRRRHNADGAMEYWLEPAELAEVRKQAGVSDPYWPPPGWKKGDDNSLWV   | 439 |
| SW1   | VFCNSILRPELRSEARKHIGDTGLLDHLLKHMAGKVAPEGQRRFRMRKHADGAMEYWLESSDITHRKQAGVSDPYWPPPGWKLGDNP---S | 403 |
| OsAM1 | GDILVKKVEELAEVGVKREIEQLSNLVQLEKETKSEAESKSSRKEKYQLWKANEKLEKQVLSMKDMYEHLVQKKGKLRKREVSLRDR     | 538 |
| AM1   | GDILVKKROVEELAEVNGVKRMEQLLCKDDGDFGAEPRDYSSLKEKYQRAWRANEKLEKQVLCMKDMCENVVMNSELKREVSATREK     | 527 |
| SW1   | QDFVTCAGIIRDIEELASLKRLLKRLAS-----KKEEEELVIMTTPNSCVTSQNDNLTPAKELIYALIKKRYIEEQLIIGET          | 483 |
| OsAM1 | YKLVLEKNDKLEEQMASLSSSELSLKEQLLPRNGDNIMRRERVEVTLGKQEGLVGEPHYDGDRISSQADAVVYVVEPKTARKSSFR      | 631 |
| AM1   | YEHVADKNDKLEEQVYLSLSSFLFSDLVVA-----LKLRLAPSEA-----VPRTALFVASGE---MTGVVIGSEDAERSSFRV         | 603 |
| SW1   | LKRVEMDMGAKKTVDENYPKKPDSTIFELLESPFQTLLEGELK-----VNGNQITESPKNREKGRKHDOQERSPLSLISNIGFR        | 568 |
| OsAM1 | CKPQCFNVMRHMASGTSVAISCEGSSCFVNSGFEQ-LFRSSSCPSGPGGLPSSRAAEVYVWSP-LDEHYVARGGNIPFANSTNAFA      | 722 |
| AM1   | CKPQCFNLPMSASC--MTIGRASSTCFADATEGPGIIPRSTSPSP--GLPSSRGEVYVAASGLDEHYVFGAHSSTPSSASTNDAAK      | 692 |
| SW1   | CRFVEMDMGAPALAAAIDNASSP-----SHRQVYVSPFPVRELAAKRPLGLT                                        | 618 |
| OsAM1 | AKLPPPEPTSELCTRALT-----LAFVPAIHNHSGLLRHHDSSEFSSAPCG--ARKMVTLEFGCRGISVVGTELALATPSYC          | 803 |
| AM1   | LQNS-LPSFRSPLCPQLRDTVTAAASLFSQKRLMHFSGLIRRDVDFSSSSGACGSGLLEKRVLEFALAGSISAVGTELALATPSYC      | 780 |
| SW1   | FPFPIIEEAPKNLFNV-----                                                                       | 635 |

**Supplementary information, Figure S4** Alignment of rice OsAM1 with SWITCH1 of *Arabidopsis* and AMEIOTIC1 of maize.

Black boxes indicate identical amino acids, and gray boxes indicate similar amino acids. The red box indicates the position of the amino acid substitution in the *Osam1-1* allele.
