# Supplementary material
Source: PubMed Central journal article supplement (PMC3203663)
Supplement: cr20117x5.pdf [file cr20117x5.pdf]

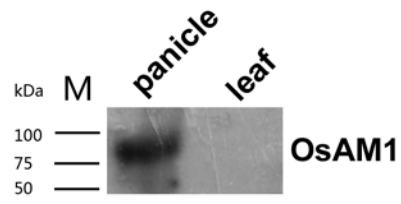

**Supplementary information, Figure S5** Western blot analysis of OsAM1 protein expression in wild type.

OsAM1 is mainly detected in panicles rather than in leaves. Lane M represents a molecular weight marker (BIO-RAD, Catalog no. 161-0374)
