# Supplementary material
Source: PubMed Central journal article supplement (PMC3203663)
Supplement: cr20117x6.pdf [file cr20117x6.pdf]

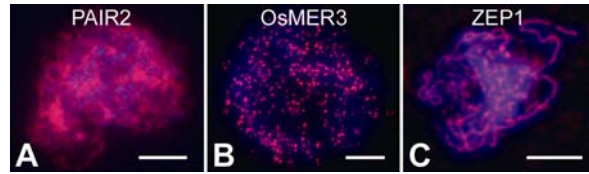

**Supplementary information, Figure S6** Immunolocalization of PAIR2 (A), OsMER3 (B) and ZEP1 (C) in wild type PMCs. All bars, 5μm
