# Supplementary material
Source: PubMed Central journal article supplement (PMC3203663)
Supplement: cr20117x7.pdf [file cr20117x7.pdf]

**Supplementary information, Table S1** Primer sequences used in the present study

|    | Forward               | Reverse              |
|----|-----------------------|----------------------|
| S1 | GCAAGTGTACATTAGCCACA  | GGGAAGATATGGTAAGAGAG |
| S2 | GAAGGTCGACTACTCTACCG  | CCTATTTCTAAACCTCCAGC |
| S3 | GAATCTTGTACCACCACAC   | CACAGCTGAGCTGGAGTTCC |
| S4 | ATAGTCATGGTTCACGCCCGG | CCTTGTAGTGGTTATGCTGC |
| S5 | ACACTAAAAATAATCGCGGC  | CGATGTGATTGCCACATTC  |
| S6 | TCCAGGAAACATCCATCTCA  | GACTTAATCTGTACTCGTCT |
